# Supplementary material for: Lithium chloride treatments in free flying honey bee colonies: efficacy, brood survival, and within-colony distribution
Source: PubMed Central journal article supplement (PMC10746590; doi:10.1007/s00436-023-08084-y), 2023-12-22

## Supplemental Information

### Lithium chloride treatments in free flying honey bee colonies: efficacy, brood survival, and within-colony distribution

*Journal of Parasitology Research*

Carolin REIN<sup>1</sup>, Marius BLUMENSCHNEIN<sup>1</sup>, Kirsten TRAYNOR<sup>1</sup>, Peter ROSENKRANZ<sup>1</sup>

<sup>1</sup>State Institute of Bee Research, University of Hohenheim, D-70599 Stuttgart, Germany

Corresponding author: C. Rein, [carolin.rein@uni-hohenheim.de](mailto:carolin.rein@uni-hohenheim.de); ORCID: 0000-0003-2764-3025

**1: Sampling protocol for 2021.** The 2<sup>nd</sup> column shows the bee sampling; the 3<sup>rd</sup> column indicates the sampling of the stored food. Bees were sampled in four-day intervals from a central frame from top and bottom box of six colonies. Food samples were taken from capped and uncapped cells on the same day. Treatment indicates the application of the 50 mM LiCl candy

| Day                | Bee sampling 2021     | Food sampling 2021     |
|--------------------|-----------------------|------------------------|
| 0                  | central, top          | uncapped food          |
| 1 treatment        |                       |                        |
| 2 treatment        |                       |                        |
| 3 treatment        |                       |                        |
| 4 treatment        |                       |                        |
| 5 treatment        | central, top + bottom | uncapped + capped food |
| 6 treatment        |                       |                        |
| 7 treatment        |                       |                        |
| 8 treatment        |                       |                        |
| 9 treatment        | central, top + bottom | uncapped + capped food |
| 10 post- treatment |                       |                        |
| 11 post- treatment |                       |                        |
| 12 post- treatment |                       |                        |
| 13 post- treatment | central, top + bottom | uncapped + capped food |
| 14 post- treatment |                       |                        |
| 15 post- treatment |                       |                        |
| 16 post- treatment |                       |                        |
| 17 post- treatment | central, top + bottom | uncapped + capped food |
| 18 post- treatment |                       |                        |
| 19 post- treatment |                       |                        |
| 20 post- treatment |                       |                        |
| 21 post- treatment | central, top + bottom | uncapped + capped food |

**2: Food consumption** of 50 mM LiCl candy for each colony, along with the mean consumption in 2018 and 2021, as well as the total amount of LiCl-salt consumed. In 2022, all 10 colonies in both treatment groups consumed 2,000 g candy either in a single or via 4 repeated treatments of 500 g candy

| <b>Year</b> | <b>Food uptake per colony [g]</b> |       |       |       |       | <b>Mean ± SD</b> | <b>Used LiCl per mean [g]</b> |
|-------------|-----------------------------------|-------|-------|-------|-------|------------------|-------------------------------|
| <b>2018</b> | 1,200                             | 3,000 | 2,900 | 1,200 | 1,900 | 2,040±786        | 3.2                           |
| <b>2021</b> | 1,833                             | 1,648 | 1,877 | 1,547 | 1,980 | 1,550            | 1,739±167                     |
| <b>2022</b> | 2,000                             |       |       |       |       |                  | 3.1                           |

**3: Statistics of efficacy in preliminary trials 2018.** Kruskal-Wallis test and post hoc Dunn's test

| <b>Category 1</b> | <b>Category 2</b> | <b>Score Mean Difference</b> | <b>Standard Error Difference</b> | <b>Z</b> | <b>p-Value</b> |
|-------------------|-------------------|------------------------------|----------------------------------|----------|----------------|
| P2                | Positive control  | 7.000                        | 2.754                            | 2.542    | 0.033*         |
| P1                | Positive control  | 5.675                        | 2.612                            | 2.172    | 0.09           |
| P2                | P1                | -1.125                       | 2.612                            | -0.431   | 1.0            |

**4: Statistics of efficacy in main experiment 2021, 2022.** Kruskal-Wallis test and post hoc Dunn's test

| <b>Category 1</b> | <b>Category 2</b> | <b>Score Mean Difference</b> | <b>Standard Error Difference</b> | <b>Z</b> | <b>p-Value</b> |
|-------------------|-------------------|------------------------------|----------------------------------|----------|----------------|
| A1                | Positive control  | 19.472                       | 5.400                            | 3.606    | 0.002*         |
| A3                | A2                | 8.506                        | 4.708                            | 1.807    | 0.425          |
| A3                | Positive control  | 7.500                        | 4.582                            | 1.637    | 0.610          |
| A2                | Positive control  | 0.906                        | 4.708                            | 0.192    | 1.0            |
| A3                | A1                | -10.867                      | 5.291                            | -2.054   | 0.240          |
| A2                | A1                | -18.467                      | 5.291                            | -3.490   | 0.003*         |

**5: Distribution of lithium during 9 day 50mM LiCl candy administration (A1, 2021) in crop of sampled bees from upper and lower frames, and food of open and capped cells, each given as mean  $\pm$  SE (n=6). Also the mean number of fallen mites is shown as orange line. No significant difference between crop samples from upper and lower frame on any day. Only food samples on day 17 show significant difference p=0.013 (Unifactorial ANOVA followed by Tukey-Kramer HSD)**

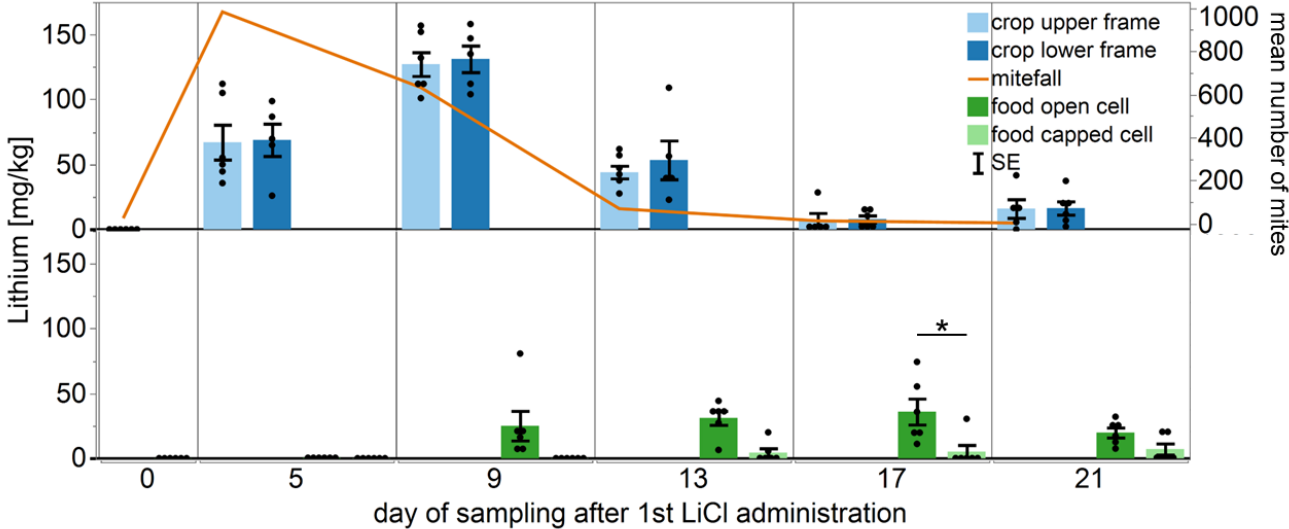

Supplement: 436_2023_8084_MOESM1_ESM.pdf [file 436_2023_8084_MOESM1_ESM.pdf]
